# Supplementary material
Source: MDPI journal article supplement (https://www.mdpi.com/1996-1073/14/11/3265)
Supplement: s1 [file s1 › energies-1228571-supplementary.pdf]

## SUPPLEMENTARY MATERIAL

For “Seasonal and multi-seasonal energy storage by Power-to-Methane technology” by Kristóf Kummer and Attila R. Imre.

| method                                             | $\eta^b$ | $\eta^s/\text{day}$   | Shelf-life (year) |
|----------------------------------------------------|----------|-----------------------|-------------------|
| Lead-acid battery                                  | 0.85     | 0.003-0.004<br>[1]    | 3-15              |
| Nickel-metal hydride battery                       | 0.80     | 0.005-0.009<br>[2]    | 5-10              |
| Lithium-ion (LiNMC/LiFePO <sub>4</sub> ) battery   | 0.95     | 0.001-0.002<br>[1]    | 2-3               |
| “Second-life” Lithium-ion battery                  | 0.5-0.8  | 0.005-0.01            | 3-6               |
| VRFB (offline)                                     | 0.75     | 0.2                   | 20-30             |
| VRFB (standby)                                     | 0.75     | 0                     | 20-30             |
| Sodium-Sulphur battery                             | 0.85     | 0.068                 | 15-25             |
| Power-to-Hydrogen (with high-pressure gas storage) | 0.75     | 0.01                  | >50               |
| Power-to-Hydrogen (with cryogenic liquid storage)  | 0.75     | 0.002-0.006<br>[3][4] | >50               |
| Power-to-Methane                                   | 0.33-0.5 | 0.000023<br>[5][6]    | >50               |
| Gravity storage                                    | 0.9      | 0.000064              | >1000             |

Table S1: Shelf-lives and range of constants of the simplified (linear) ADSF(t) function (Equation 3), used in Figure 5a and 5b taken from various sources and from own estimates.

### Sources

- (1) Thilo Bocklisch, “Hybrid energy storage systems for renewable energy applications”, Energy Procedia 73 (2015) 103-111, 9<sup>th</sup> International Renewable Energy Storage Conference, IRES 2015
- (2) Christine Jeyaseelan, Antil Jain, Parul Khurana, Dinesh Kumar and Sheenam Thatai, “Ni-Cd Batteries” in Rechargeable Batteries: History, Progress, and Applications (eds.: Rajender Boddula Inamuddin Ramyakrishna Pothu Abdullah M. Asiri) 2020 <https://doi.org/10.1002/9781119714774.ch9>
- (3) W. A. Amos, “Costs of Storing and Transporting Hydrogen.”, NREL/TP-570-25106, 1998, <https://www.nrel.gov/docs/fy99osti/25106.pdf>
- (4) G. Petitpa: Boil-off losses along LH2 pathway, OSTI report,

<https://www.osti.gov/biblio/1466121-boil-off-losses-along-lh2-pathway> 2018.

(5) D.A. Kirchgessner, R.A. Lott, R.M. Cowgill, M.R. Harrison, T.M. Shires: Estimate of methane emissions from the U.S. natural gas industry, 1997, U.S. Environmental Protection Agency

(6) Hungarian methane emission: [http://www.ksh.hu/docs/hun/xstadat/xstadat\\_eves/i\\_ua028d.html](http://www.ksh.hu/docs/hun/xstadat/xstadat_eves/i_ua028d.html)
